# Supplementary material for: Improving the Accuracy in Classification of Blood Pressure from Photoplethysmography Using Continuous Wavelet Transform and Deep Learning
Source: Int J Hypertens. 2021 Aug 5;2021:9938584. doi: 10.1155/2021/9938584 (PMC8360747; doi:10.1155/2021/9938584)
Supplement: Supplementary Materials — S_file 1: Python code for scalograms transformed from PPG by continuous wavelet transform. S_file 2: Python code for predicting classification of blood pressure by deep learning. S_file 3: the dataset from Waveform Database provided by PhysioNet. [file 9938584.f1.zip]

Archive with 3 entries (3 files):
- 9938584.f1/S_file 1.py
- 9938584.f1/S_file 2.py
- 9938584.f1/S_file 3.csv
