# Supplementary material for: Improving the Accuracy in Classification of Blood Pressure from Photoplethysmography Using Continuous Wavelet Transform and Deep Learning
Source: Int J Hypertens. 2021 Aug 5;2021:9938584. doi: 10.1155/2021/9938584 (PMC8360747; doi:10.1155/2021/9938584)
Supplement: Supplementary Materials — S_file 1: Python code for scalograms transformed from PPG by continuous wavelet transform. S_file 2: Python code for predicting classification of blood pressure by deep learning. S_file 3: the dataset from Waveform Database provided by PhysioNet. [file 9938584.f1.zip › 9938584.f1/S_file 3.csv]

PPG	ABP
1.759530792	67.06295517
1.718475073	69.35862807
1.684261975	75.36645289
1.657869013	85.03758554
1.637341153	96.22288542
1.615835777	105.9428622
1.593352884	112.9275691
1.57086999	117.6654472
1.549364614	120.9868463
1.52688172	123.184831
1.50342131	124.3570895
1.478983382	124.60131
1.453567937	124.1617131
1.428152493	123.2825192
1.402737048	122.0614166
1.377321603	120.5960934
1.357771261	118.7400175
1.34115347	116.6885651
1.323558162	114.2463599
1.305962854	111.6087783
1.288367546	108.8246643
1.271749756	105.6986416
1.258064516	102.2795543
1.24340176	98.76277884
1.228739003	95.00178281
1.212121212	91.4361632
1.193548387	88.11476411
1.173020528	85.42833837
1.158357771	83.4257301
1.152492669	82.00925107
1.158357771	81.03236899
1.189638319	80.49508384
1.260997067	80.15317511
1.37829912	79.86011049
1.541544477	79.66473407
1.738025415	79.46935765
1.954056696	79.32282534
2.171065494	78.98091661
2.370478983	78.68785198
2.539589443	78.29709915
2.672531769	77.80865811
2.761485826	77.17368475
2.824046921	76.53871139
2.875855327	75.90373804
2.906158358	75.31760879
2.917888563	74.68263543
2.914956012	74.04766208
2.899315738	73.51037693
2.871945259	73.07077999
2.832844575	72.63118305
2.781036168	72.24043022
2.716520039	71.84967738
2.641251222	71.50776865
2.565004888	71.11701582
2.485826002	70.72626299
2.392961877	70.28666605
2.292277615	69.79822501
2.189638319	69.35862807
2.089931574	68.91903113
1.996089932	68.47943419
1.913000978	67.99099315
1.840664712	67.4048639
1.779081134	67.30717569
1.729227761	68.43059009
1.688172043	72.48465074
1.654936461	80.29970742
1.631476051	90.75234574
1.612903226	100.9119194
1.593352884	108.8735084
1.572825024	114.3440481
1.551319648	118.0562
1.528836755	120.6937817
1.505376344	122.3544812
1.479960899	123.0382987
1.455522972	122.8429222
1.430107527	122.1102607
1.404692082	121.0356904
1.380254154	119.6680555
1.362658847	117.9096677
1.34799609	115.8582153
1.330400782	113.5136983
1.31085044	110.8761167
1.293255132	107.9943145
1.277614858	104.917136
1.261974585	101.5957369
1.247311828	98.17664959
1.231671554	94.61102998
1.215053763	91.04541036
1.196480938	87.87054359
1.173998045	85.18411785
1.151515152	83.13266547
1.136852395	81.66734234
1.135874878	80.59277205
1.153470186	79.86011049
1.205278592	79.42051355
1.301075269	79.12744892
1.444770283	78.8832284
1.630498534	78.59016377
1.84457478	78.34594325
2.06744868	78.10172273
2.28054741	77.80865811
2.468230694	77.41790527
2.62170088	76.97830833
2.727272727	76.53871139
2.795698925	76.09911446
2.846529814	75.56182931
2.877810362	74.97570006
2.890518084	74.3407267
2.88856305	73.80344156
2.87487781	73.2173123
2.850439883	72.68002716
2.815249267	72.24043022
2.766373412	71.80083328
2.705767351	71.41008045
2.633431085	71.06817172
2.551319648	70.72626299
2.471163245	70.38435426
2.389051808	69.94475732
2.296187683	69.50516038
2.198435973	68.96787523
2.101661779	68.43059009
2.009775171	67.94214904
1.9257087	67.4048639
1.8514174	66.91642285
1.786901271	66.52567002
1.732160313	66.96526696
1.687194526	69.55400448
1.649071359	75.75720573
1.620723363	85.28180606
1.599217986	95.88097669
1.578690127	104.7217596
1.557184751	110.9738049
1.535679374	115.0767097
1.515151515	117.9096677
1.494623656	119.8145878
1.47311828	120.7914699
1.450635386	120.9868463
1.428152493	120.4495611
1.403714565	119.4726791
1.377321603	118.1050441
1.351906158	116.4443446
1.333333333	114.3440481
1.31769306	111.9995311
1.300097752	109.3131054
1.282502444	106.3824591
1.265884653	103.2564364
1.250244379	99.93503734
1.23655914	96.41826183
1.2228739	92.80379812
1.207233627	89.23817851
1.189638319	86.06331173
1.168132942	83.4257301
1.144672532	81.42312182
1.128054741	79.86011049
1.121212121	78.78554019
1.127077224	78.05287863
1.159335288	77.56443758
1.231671554	77.17368475
1.350928641	76.78293192
1.516129032	76.53871139
1.715542522	76.29449087
1.930596285	76.05027035
2.143695015	75.75720573
2.337243402	75.415297
2.499511241	75.17107648
2.625610948	74.78032364
2.708699902	74.43841491
2.759530792	73.90112976
2.791788856	73.41268872
2.80742913	72.92424768
2.808406647	72.43580664
2.795698925	71.9962097
2.77028348	71.50776865
2.734115347	71.11701582
2.687194526	70.72626299
2.629521017	70.48204247
2.560117302	70.18897784
2.479960899	69.79822501
2.401759531	69.50516038
2.322580645	69.06556344
2.230694037	68.6259665
2.132942326	68.03983725
2.036168133	67.55139621
1.942326491	66.96526696
1.856304985	66.42798181
1.780058651	65.93954077
1.715542522	65.59763204
1.661779081	66.13491718
1.616813294	68.72365471
1.581622678	74.97570006
1.556207234	84.5979886
1.536656891	95.19715923
1.517106549	103.8425657
1.49657869	109.8503905
1.475073314	113.806763
1.451612903	116.4443446
1.427174976	117.9096677
1.401759531	118.3492647
1.375366569	118.0562
1.348973607	117.0304738
1.322580645	115.7605271
1.298142717	114.0998276
1.27370479	112.2437516
1.256109482	110.094611
1.242424242	107.750094
1.226783969	105.1613565
1.212121212	102.3772426
1.198435973	99.34890809
1.18572825	96.17404131
1.173998045	92.80379812
1.16226784	89.48239903
1.149560117	86.35637635
1.133919844	83.81648293
1.114369501	81.81387466
1.090909091	80.49508384
1.0742913	79.56704586
1.066471163	78.9320725
1.070381232	78.49247557
1.100684262	78.19941094
1.172043011	77.85750221
1.290322581	77.46674938
1.454545455	77.22252885
1.65200391	76.92946423
1.867057674	76.68524371
2.080156403	76.34333498
2.27370479	75.90373804
2.436950147	75.56182931
2.563049853	75.12223237
2.644183773	74.68263543
2.692082111	74.19419439
2.720430108	73.65690924
2.730205279	73.2173123
2.725317693	72.87540357
2.706744868	72.48465074
2.676441838	72.09389791
2.635386119	71.75198918
2.583577713	71.41008045
2.521994135	71.11701582
2.450635386	70.82395119
2.370478983	70.43319836
2.294232649	69.94475732
2.217986315	69.40747217
2.131964809	68.87018702
2.043010753	68.23521367
1.956989247	67.60024031
1.875855327	67.06295517
1.804496579	66.52567002
1.743890518	66.13491718
1.694037146	66.62335823
1.652981427	69.50516038
1.619745846	76.19680266
1.593352884	86.25868815
1.572825024	96.80901467
1.558162268	105.1613565
1.544477028	110.8272726
1.528836755	114.5394245
1.513196481	117.1770061
1.49657869	118.8865498
1.478005865	119.5703673
1.458455523	119.4238349
1.438905181	118.6911734
1.417399804	117.6166031
1.395894428	116.2489682
1.376344086	114.6371127
1.357771261	112.6833486
1.345063539	110.4853639
1.33431085	108.0920028
1.321603128	105.5032652
1.308895406	102.6214631
1.2971652	99.4954404
1.286412512	96.22288542
1.275659824	92.85264222
1.262952102	89.53124313
1.247311828	86.50290867
1.227761486	84.01185935
1.205278592	82.10693928
1.184750733	80.88583668
1.174975562	80.0066428
1.183773216	79.37166944
1.217008798	78.8832284
1.289345064	78.49247557
1.408602151	78.10172273
1.572825024	77.80865811
1.771260997	77.46674938
1.987292278	77.12484065
2.200391007	76.78293192
2.395894428	76.44102319
2.560117302	76.05027035
2.688172043	75.61067341
2.779081134	75.12223237
2.833822092	74.63379133
2.862170088	74.04766208
2.875855327	73.41268872
2.875855327	72.87540357
2.863147605	72.24043022
2.839687195	71.75198918
2.805474096	71.36123634
2.760508309	70.97048351
2.716520039	70.62857478
2.66568915	70.23782194
2.594330401	69.94475732
2.51026393	69.55400448
2.416422287	69.11440755
2.327468231	68.67481061
2.24340176	68.23521367
2.153470186	67.79561673
2.063538612	67.35601979
1.979472141	66.86757875
1.905180841	66.37913771
1.841642229	66.13491718
1.787878788	67.11179927
1.743890518	70.97048351
1.708699902	78.78554019
1.678396872	89.38471082
1.65200391	99.88619324
1.631476051	107.9943145
1.613880743	113.5136983
1.593352884	117.3235385
1.57086999	119.912276
1.546432063	121.6218196
1.521016618	122.3544812
1.494623656	122.3544812
1.468230694	121.8660402
1.440860215	120.9868463
1.412512219	119.8145878
1.38514174	118.3004205
1.359726295	116.4443446
1.336265885	114.295204
1.319648094	111.8529988
1.306940371	109.1177289
1.292277615	106.1870827
1.276637341	103.0122159
1.261974585	99.59312861
1.248289345	96.0763531
1.233626588	92.5595776
1.216031281	89.28702261
1.195503421	86.55175277
1.173020528	84.35376808
1.154447703	82.74191264
1.149560117	81.56965413
1.163245357	80.69046026
1.205278592	80.10433101
1.291300098	79.66473407
1.427174976	79.32282534
1.610948192	78.9320725
1.829912023	78.54131967
2.065493646	78.24825504
2.298142717	77.85750221
2.508308895	77.46674938
2.684261975	77.02715244
2.823069404	76.68524371
2.923753666	76.19680266
2.990224829	75.61067341
3.025415445	75.07338827
3.039100684	74.48725902
3.041055718	73.85228566
3.031280547	73.31500051
3.009775171	72.77771537
2.976539589	72.28927432
2.930596285	71.94736559
2.871945259	71.55661276
2.80058651	71.21470403
2.717497556	70.9216394
2.623655914	70.53088657
2.521994135	70.18897784
2.426197458	69.7493809
2.33431085	69.30978396
2.234604106	68.87018702
2.135874878	68.43059009
2.042033236	67.99099315
1.956989247	67.5025521
1.883675464	67.69792852
1.819159335	69.65169269
1.765395894	75.12223237
1.721407625	84.06070345
1.685239492	94.61102998
1.653958944	103.9402539
1.627565982	110.8272726
1.607038123	115.4674625
1.588465298	118.7888616
1.566959922	121.1333786
1.543499511	122.3544812
1.519061584	122.745234
1.492668622	122.4521694
1.46627566	121.6706637
1.439882698	120.6937817
1.413489736	119.2284585
1.388074291	117.4700708
1.363636364	115.3697743
1.340175953	112.9764132
1.321603128	110.3876757
1.307917889	107.5058735
1.292277615	104.3798508
1.275659824	101.0584517
1.259042033	97.59052034
1.242424242	94.07374483
1.2228739	90.60581343
1.202346041	87.52863486
1.179863148	85.03758554
1.157380254	83.18150958
1.142717498	81.86271876
1.146627566	80.88583668
1.181818182	80.25086332
1.240469208	79.81126638
1.332355816	79.46935765
1.477028348	79.17629303
1.666666667	78.9320725
1.885630499	78.59016377
2.114369501	78.24825504
2.333333333	77.80865811
2.52688172	77.36906117
2.686217009	76.88062012
2.80742913	76.34333498
2.893450635	75.75720573
2.950146628	75.17107648
2.979472141	74.53610312
2.989247312	73.99881797
2.987292278	73.51037693
2.974584555	72.97309178
2.94916911	72.63118305
2.911045943	72.24043022
2.860215054	71.94736559
2.796676442	71.60545686
2.720430108	71.31239224
2.633431085	70.9216394
2.537634409	70.53088657
2.434995112	70.09128963
2.340175953	69.60284859
2.249266862	69.11440755
2.151515152	68.6259665
2.055718475	68.08868136
1.965786901	67.60024031
1.885630499	67.69792852
1.815249267	69.30978396
1.755620723	74.24303849
1.705767351	82.79075674
1.664711632	93.24339506
1.631476051	102.8168395
1.602150538	109.9480787
1.57771261	114.7348009
1.558162268	118.0562
1.54056696	120.2541847
1.519061584	121.3775991
1.49657869	121.6218196
1.47311828	121.1822227
1.447702835	120.3030288
1.420332356	119.0330821
1.391006843	117.567759
1.362658847	115.6628389
1.335288368	113.5136983
1.309872923	111.1203372
1.285434995	108.4827556
1.267839687	105.6009534
1.255131965	102.4749308
1.241446725	99.10468757
1.226783969	95.63675617
1.212121212	92.07113655
1.196480938	88.70089336
1.179863148	85.721403
1.159335288	83.37688599
1.136852395	81.61849824
1.11827957	80.34855153
1.115347019	79.46935765
1.140762463	78.8832284
1.207233627	78.44363146
1.2971652	78.05287863
1.418377322	77.80865811
1.589442815	77.56443758
1.795698925	77.32021706
2.015640274	77.02715244
2.228739003	76.73408781
2.418377322	76.34333498
2.573802542	76.00142625
2.694037146	75.4641411
2.778103617	74.97570006
2.831867058	74.43841491
2.861192571	73.85228566
2.869990225	73.36384462
2.864125122	72.87540357
2.848484848	72.43580664
2.823069404	72.0450538
2.785923754	71.65430097
2.736070381	71.36123634
2.673509286	71.06817172
2.598240469	70.72626299
2.511241447	70.38435426
2.41544477	69.94475732
2.311827957	69.35862807
2.206256109	68.87018702
2.100684262	68.28405777
2.009775171	67.79561673
1.929618768	67.35601979
1.849462366	67.06295517
1.775171065	67.55139621
1.709677419	70.18897784
1.652981427	76.53871139
1.604105572	86.35637635
1.563049853	97.00439108
1.528836755	105.7474857
1.499511241	111.6576224
1.474095797	115.6139948
1.449657869	118.2515764
1.42913001	119.7657437
1.410557185	120.1564965
1.388074291	119.7657437
1.362658847	118.8865498
1.336265885	117.6166031
1.308895406	116.2001241
1.282502444	114.4417363
1.257086999	112.439128
1.233626588	110.094611
1.212121212	107.5547176
1.19257087	104.8194478
1.177908113	101.7911133
1.166177908	98.56740242
1.159335288	95.09947102
1.154447703	91.63153962
1.144672532	88.31014052
1.129032258	85.37949427
1.107526882	83.03497726
1.083088954	81.56965413
1.057673509	80.54392795
1.041055718	79.90895459
1.045943304	79.56704586
1.086021505	79.22513713
1.169110459	78.98091661
1.302052786	78.73669609
1.449657869	78.49247557
1.61485826	78.24825504
1.820136852	77.90634631
2.038123167	77.61328169
2.245356794	77.22252885
2.425219941	76.78293192
2.567937439	76.29449087
2.672531769	75.80604983
2.741935484	75.31760879
2.782991202	74.78032364
2.80058651	74.3407267
2.80058651	73.90112976
2.785923754	73.60806514
2.761485826	73.31500051
2.727272727	73.07077999
2.68230694	72.77771537
2.625610948	72.48465074
2.557184751	72.0450538
2.478005865	71.50776865
2.390029326	70.8727953
2.294232649	70.23782194
2.194525904	69.60284859
2.095796676	68.96787523
2.001955034	68.43059009
1.915933529	67.84446083
1.847507331	67.5025521
1.792766373	67.99099315
1.732160313	70.97048351
1.671554252	77.90634631
1.626588465	88.16360821
1.591397849	98.90931115
1.56402737	107.3593412
1.541544477	113.1229455
1.521994135	116.9816297
1.504398827	119.6680555
1.486803519	121.3775991
1.469208211	122.0614166
1.450635386	121.8660402
1.434017595	121.1822227
1.419354839	120.1564965
1.401759531	118.9353939
1.383186706	117.4212267
1.364613881	115.5651507
1.345063539	113.367166
1.326490714	110.9738049
1.307917889	108.4339115
1.291300098	105.5521093
1.277614858	102.4749308
1.263929619	99.25121988
1.250244379	95.78328848
1.240469208	92.36420118
1.230694037	89.1893344
1.214076246	86.50290867
1.191593353	84.50030039
1.169110459	83.13266547
1.154447703	82.10693928
1.158357771	81.37427772
1.194525904	80.78814847
1.27370479	80.29970742
1.400782014	79.86011049
1.572825024	79.46935765
1.780058651	79.17629303
2.004887586	78.8832284
2.19941349	78.49247557
2.366568915	78.10172273
2.529814272	77.759814
2.668621701	77.32021706
2.776148583	76.73408781
2.852394917	76.19680266
2.902248289	75.56182931
2.928641251	74.97570006
2.936461388	74.43841491
2.928641251	73.85228566
2.908113392	73.41268872
2.87487781	72.97309178
2.833822092	72.53349484
2.784946237	72.24043022
2.724340176	71.84967738
2.65200391	71.50776865
2.568914956	71.06817172
2.477028348	70.53088657
2.379276637	70.09128963
2.279569892	69.65169269
2.181818182	69.26093986
2.088954057	68.82134292
2.004887586	68.38174598
1.929618768	68.28405777
1.864125122	69.7493809
1.813294233	74.43841491
1.773216031	83.03497726
1.734115347	93.92721252
1.698924731	104.1844744
1.668621701	111.8041547
1.641251222	116.9816297
1.615835777	120.5960934
1.591397849	123.1359869
1.565004888	124.60131
1.539589443	125.1874393
1.513196481	124.9920628
1.485826002	124.4059336
1.463343109	123.5755838
1.443792766	122.3056371
1.419354839	120.7426258
1.393939394	118.7888616
1.369501466	116.639721
1.345063539	114.2463599
1.321603128	111.5110901
1.300097752	108.4827556
1.28054741	105.2590447
1.264907136	101.7422692
1.249266862	98.12780548
1.232649071	94.51334177
1.219941349	91.09425447
1.206256109	88.31014052
1.187683284	86.06331173
1.169110459	84.35376808
1.159335288	83.18150958
1.171065494	82.3023157
1.218963832	81.71618645
1.312805474	81.37427772
1.456500489	81.03236899
1.643206256	80.73930436
1.861192571	80.44623974
2.089931574	80.10433101
2.31085044	79.66473407
2.485826002	79.22513713
2.62170088	78.78554019
2.742913001	78.29709915
2.839687195	77.759814
2.910068426	77.17368475
2.955034213	76.53871139
2.980449658	75.90373804
2.990224829	75.36645289
2.985337243	74.87801185
2.966764418	74.43841491
2.936461388	73.99881797
2.893450635	73.60806514
2.842619746	73.31500051
2.782991202	72.92424768
2.708699902	72.53349484
2.62170088	72.09389791
2.524926686	71.65430097
2.421309873	71.16585992
2.314760508	70.67741888
2.209188661	70.09128963
2.108504399	69.55400448
2.016617791	69.11440755
1.933528837	69.50516038
1.860215054	72.0450538
1.796676442	78.24825504
1.747800587	87.82169948
1.709677419	98.46971421
1.674486804	107.5547176
1.642228739	114.0509835
1.612903226	118.5446411
1.58455523	121.7195078
1.557184751	123.8198043
1.530791789	124.9432187
1.502443793	125.1874393
1.474095797	124.7966864
1.446725318	124.112869
1.419354839	123.1359869
1.397849462	121.8171961
1.380254154	120.0588083
1.358748778	117.9096677
1.336265885	115.4186184
1.312805474	112.7321927
1.291300098	109.8015464
1.272727273	106.5289914
1.254154448	103.1099041
1.23655914	99.54428451
1.218963832	95.88097669
1.198435973	92.31535707
1.175953079	89.23817851
1.150537634	86.74712919
1.130987292	84.79336502
1.11827957	83.4745742
1.115347019	82.54653622
1.136852395	82.00925107
1.196480938	81.56965413
1.302052786	81.2277454
1.456500489	80.88583668
1.649071359	80.54392795
1.866080156	80.25086332
2.08797654	79.86011049
2.296187683	79.42051355
2.476050831	78.98091661
2.608993157	78.49247557
2.7028348	77.90634631
2.781036168	77.32021706
2.836754643	76.68524371
2.871945259	76.00142625
2.890518084	75.36645289
2.894428152	74.78032364
2.884652981	74.2918826
2.862170088	73.85228566
2.826001955	73.51037693
2.7771261	73.07077999
2.714565005	72.72887126
2.638318671	72.38696253
2.561094819	71.9962097
2.481915934	71.55661276
2.390029326	70.97048351
2.289345064	70.43319836
2.18572825	69.7493809
2.085043988	69.11440755
1.989247312	68.47943419
1.901270772	68.08868136
1.824046921	68.96787523
1.757575758	72.77771537
1.700879765	80.49508384
1.653958944	90.94772216
1.619745846	101.3026723
1.593352884	109.3131054
1.565982405	114.6371127
1.539589443	118.2027323
1.514173998	120.5472493
1.488758553	122.0614166
1.462365591	122.5498576
1.43597263	122.4521694
1.408602151	121.8171961
1.380254154	120.8891581
1.351906158	119.6680555
1.323558162	118.1050441
1.296187683	116.2489682
1.275659824	114.0509835
1.26001955	111.5599342
1.241446725	108.7269761
1.2228739	105.5521093
1.203323558	102.0353338
1.183773216	98.46971421
1.165200391	94.9040946
1.145650049	91.63153962
1.124144673	88.74973746
1.100684262	86.35637635
1.073313783	84.5491445
1.046920821	83.37688599
1.031280547	82.69306853
1.035190616	82.25347159
1.064516129	81.71618645
1.134897361	81.03236899
1.252199413	80.25086332
1.41544477	79.56704586
1.61485826	79.02976071
1.833822092	78.68785198
2.052785924	78.34594325
2.253176931	77.90634631
2.423264907	77.46674938
2.557184751	76.92946423
2.654936461	76.24564677
2.713587488	75.56182931
2.745845552	74.87801185
2.766373412	74.24303849
2.772238514	73.80344156
2.765395894	73.41268872
2.746823069	73.1196241
2.716520039	72.72887126
2.673509286	72.43580664
2.617790811	72.19158611
2.549364614	71.9962097
2.469208211	71.84967738
2.37829912	71.75198918
2.291300098	71.50776865
2.204301075	71.11701582
2.105571848	70.48204247
2.003910068	69.79822501
1.903225806	69.06556344
1.809384164	68.82134292
1.727272727	70.04244553
1.655913978	74.48725902
1.596285435	82.83960085
1.54740958	93.63414789
1.506353861	103.6960334
1.472140762	111.0714931
1.443792766	115.9070594
1.42228739	119.1796144
1.404692082	121.2310668
1.384164223	122.256793
1.361681329	122.256793
1.338220919	121.4752873
1.314760508	120.3030288
1.290322581	118.8865498
1.265884653	117.2258503
1.238514174	115.223242
1.211143695	112.9764132
1.186705767	110.534208
1.165200391	107.7989381
1.150537634	104.7217596
1.140762463	101.4492046
1.129032258	97.93242907
1.117302053	94.36680945
1.10459433	90.85003395
1.090909091	87.87054359
1.0742913	85.42833837
1.053763441	83.71879472
1.031280547	82.69306853
1.010752688	82.05809518
1.002932551	81.61849824
1.020527859	81.2277454
1.077223851	80.93468078
1.158357771	80.54392795
1.270772239	80.15317511
1.434995112	79.81126638
1.634408602	79.42051355
1.8514174	78.98091661
2.065493646	78.54131967
2.258064516	78.05287863
2.418377322	77.46674938
2.542521994	76.92946423
2.629521017	76.24564677
2.685239492	75.65951752
2.714565005	75.12223237
2.722385142	74.63379133
2.715542522	74.09650618
2.697947214	73.75459745
2.669599218	73.41268872
2.630498534	73.1196241
2.579667644	72.77771537
2.517106549	72.43580664
2.442815249	72.0450538
2.358748778	71.55661276
2.26686217	71.06817172
2.170087977	70.53088657
2.073313783	70.04244553
1.980449658	69.60284859
1.902248289	69.11440755
1.835777126	68.72365471
1.771260997	69.06556344
1.714565005	71.21470403
1.66568915	76.97830833
1.625610948	86.50290867
1.593352884	97.44398802
1.565982405	106.822056
1.541544477	113.4160101
1.520039101	117.8608236
1.499511241	120.9380022
1.478005865	122.9894546
1.45943304	124.0151807
1.442815249	124.112869
1.421309873	123.6244279
1.396871945	122.6963899
1.374389052	121.4752873
1.351906158	120.0588083
1.329423265	118.3492647
1.308895406	116.2001241
1.289345064	113.7579189
1.270772239	111.0714931
1.253176931	108.2385351
1.23655914	105.0636683
1.225806452	101.5957369
1.218963832	97.93242907
1.210166178	94.31796535
1.198435973	90.85003395
1.183773216	87.82169948
1.164222874	85.28180606
1.140762463	83.66995062
1.122189638	82.59538032
1.119257087	81.86271876
1.144672532	81.27658951
1.210166178	80.78814847
1.323558162	80.49508384
1.484848485	80.29970742
1.653958944	80.0554869
1.830889541	79.76242228
2.039100684	79.42051355
2.249266862	78.98091661
2.440860215	78.54131967
2.600195503	78.10172273
2.722385142	77.56443758
2.810361681	76.97830833
2.867057674	76.34333498
2.900293255	75.80604983
2.915933529	75.21992058
2.914956012	74.68263543
2.901270772	74.19419439
2.876832845	73.75459745
2.841642229	73.41268872
2.795698925	73.07077999
2.738025415	72.68002716
2.667644184	72.28927432
2.58455523	71.94736559
2.490713587	71.55661276
2.389051808	71.11701582
2.283479961	70.67741888
2.177908113	70.18897784
2.076246334	69.79822501
1.980449658	69.35862807
1.904203324	69.35862807
1.841642229	70.82395119
1.782013685	75.415297
1.729227761	83.86532704
1.683284457	94.65987408
1.64516129	104.917136
1.612903226	112.6833486
1.583577713	117.9096677
1.556207234	121.6218196
1.530791789	124.2594013
1.505376344	125.8224126
1.480938416	126.4085419
1.460410557	126.3596978
1.441837732	125.8224126
1.419354839	124.8455305
1.394916911	123.6244279
1.368523949	122.0125725
1.34115347	119.912276
1.315738025	117.6166031
1.292277615	114.9301774
1.270772239	112.0483752
1.250244379	108.9223525
1.231671554	105.5521093
1.215053763	101.9864897
1.19941349	98.3231819
1.188660802	94.65987408
1.176930596	91.38731909
1.159335288	88.55436105
1.138807429	86.40522046
1.11827957	84.93989733
1.107526882	83.86532704
1.119257087	83.13266547
1.166177908	82.59538032
1.258064516	82.25347159
1.398826979	81.91156286
1.58455523	81.61849824
1.799608993	81.27658951
1.997067449	80.93468078
2.177908113	80.49508384
2.366568915	80.0554869
2.536656891	79.61588996
2.676441838	79.12744892
2.782991202	78.49247557
2.857282502	77.85750221
2.905180841	77.22252885
2.93255132	76.6363996
2.943304008	76.00142625
2.939393939	75.4641411
2.921798631	74.97570006
2.891495601	74.63379133
2.8514174	74.24303849
2.802541544	73.85228566
2.739002933	73.51037693
2.661779081	73.1684682
2.571847507	72.72887126
2.472140762	72.24043022
2.365591398	71.80083328
2.256109482	71.31239224
2.1485826	70.72626299
2.045943304	70.23782194
1.953079179	69.84706911
1.869990225	70.28666605
1.805474096	73.1684682
1.754643206	79.66473407
1.706744868	89.53124313
1.663734115	100.4234784
1.626588465	109.5573259
1.595307918	115.9070594
1.566959922	120.2541847
1.54056696	123.184831
1.515151515	125.0409069
1.48973607	125.9689449
1.464320626	126.1154772
1.436950147	125.6270362
1.407624633	124.7478423
1.383186706	123.5755838
1.362658847	122.0125725
1.337243402	120.0588083
1.311827957	117.8119795
1.288367546	115.3209302
1.264907136	112.4879721
1.24340176	109.4107936
1.224828935	106.0405504
1.208211144	102.572619
1.19257087	98.90931115
1.176930596	95.29484744
1.160312805	91.92460424
1.145650049	89.04280209
1.130987292	86.79597329
1.109481916	85.13527375
1.089931574	83.91417114
1.083088954	83.03497726
1.10459433	82.49769212
1.165200391	82.10693928
1.272727273	81.71618645
1.428152493	81.42312182
1.623655914	81.03236899
1.842619746	80.59277205
2.065493646	80.15317511
2.27370479	79.66473407
2.43597263	79.17629303
2.559139785	78.59016377
2.66568915	78.05287863
2.746823069	77.41790527
2.803519062	76.73408781
2.83773216	76.05027035
2.853372434	75.31760879
2.853372434	74.53610312
2.838709677	73.90112976
2.811339198	73.31500051
2.772238514	72.72887126
2.720430108	72.24043022
2.663734115	71.80083328
2.600195503	71.36123634
2.521016618	70.9216394
2.42913001	70.43319836
2.329423265	69.94475732
2.225806452	69.30978396
2.122189638	68.72365471
2.021505376	68.08868136
1.927663734	67.60024031
1.843597263	67.30717569
1.77028348	67.99099315
1.707722385	71.31239224
1.654936461	78.54131967
1.61485826	88.99395798
1.582600196	99.93503734
1.552297165	108.8246643
1.524926686	114.9301774
1.498533724	119.1307703
1.472140762	121.9148843
1.445747801	123.673272
1.418377322	124.3570895
1.390029326	124.2594013
1.359726295	123.5755838
1.327468231	122.5987017
1.296187683	121.3775991
1.270772239	119.8145878
1.248289345	117.8608236
1.2228739	115.6628389
1.195503421	113.2206337
1.168132942	110.4853639
1.143695015	107.3593412
1.120234604	103.989098
1.097751711	100.3746343
1.076246334	96.56479415
1.054740958	92.85264222
1.032258065	89.48239903
1.005865103	86.74712919
0.977517107	84.69567681
0.956989247	83.18150958
0.945259042	82.10693928
0.96285435	81.42312182
1.015640274	80.93468078
1.095796676	80.59277205
1.217986315	80.29970742
1.384164223	80.0554869
1.588465298	79.86011049
1.81427175	79.56704586
2.043010753	79.22513713
2.254154448	78.9320725
2.434017595	78.49247557
2.56402737	78.05287863
2.652981427	77.46674938
2.723362659	76.92946423
2.77028348	76.34333498
2.794721408	75.80604983
2.802541544	75.21992058
2.795698925	74.73147954
2.7771261	74.24303849
2.747800587	73.85228566
2.707722385	73.51037693
2.654936461	73.1196241
2.589442815	72.72887126
2.512218964	72.28927432
2.434995112	71.80083328
2.35483871	71.31239224
2.26001955	70.82395119
2.158357771	70.28666605
2.055718475	69.79822501
1.956989247	69.30978396
1.865102639	69.16325165
1.782991202	70.28666605
1.712609971	74.3407267
1.653958944	82.3511598
1.605083089	93.04801864
1.565004888	103.500657
1.536656891	111.4134018
1.515151515	116.6885651
1.493646139	120.1076524
1.472140762	122.3056371
1.450635386	123.2825192
1.42913001	123.4290515
1.406647116	122.7940781
1.383186706	121.8171961
1.359726295	120.4984052
1.335288368	118.8865498
1.31085044	116.9327856
1.287390029	114.7348009
1.269794721	112.2437516
1.255131965	109.5573259
1.237536657	106.5289914
1.219941349	103.3052805
1.202346041	99.88619324
1.186705767	96.22288542
1.171065494	92.75495401
1.15542522	89.53124313
1.137829912	86.9425056
1.116324536	84.98874143
1.092864125	83.62110651
1.072336266	82.59538032
1.062561095	81.86271876
1.070381232	81.27658951
1.10459433	80.88583668
1.17888563	80.44623974
1.300097752	80.0554869
1.467253177	79.66473407
1.668621701	79.37166944
1.88856305	79.02976071
2.107526882	78.59016377
2.307917889	78.19941094
2.476050831	77.66212579
2.607038123	77.17368475
2.701857283	76.53871139
2.758553275	75.90373804
2.786901271	75.36645289
2.802541544	74.78032364
2.804496579	74.24303849
2.792766373	73.80344156
2.769305963	73.36384462
2.734115347	73.07077999
2.687194526	72.72887126
2.627565982	72.43580664
2.556207234	72.0450538
2.474095797	71.65430097
2.384164223	71.16585992
2.287390029	70.67741888
2.200391007	70.18897784
2.119257087	69.65169269
2.032258065	69.30978396
1.948191593	68.87018702
1.870967742	68.6259665
1.804496579	69.40747217
1.747800587	72.92424768
1.699902248	80.44623974
1.660801564	91.19194268
1.6285435	102.133022
1.601173021	110.6807403
1.576735093	116.4443446
1.557184751	120.2541847
1.53372434	122.9406105
1.509286413	124.5036218
1.490713587	125.1385951
1.468230694	124.9432187
1.443792766	124.2594013
1.419354839	123.2825192
1.394916911	122.0614166
1.370478983	120.4984052
1.34799609	118.495797
1.325513196	116.2001241
1.304985337	113.6113865
1.287390029	110.8272726
1.275659824	107.750094
1.268817204	104.4286949
1.26001955	100.9119194
1.250244379	97.29745571
1.238514174	93.68299199
1.224828935	90.41043701
1.208211144	87.67516717
1.186705767	85.62371479
1.165200391	84.15839166
1.149560117	83.18150958
1.153470186	82.49769212
1.190615836	81.91156286
1.253176931	81.42312182
1.349951124	81.03236899
1.500488759	80.69046026
1.694037146	80.34855153
1.913000978	80.0554869
2.139784946	79.66473407
2.353861193	79.22513713
2.539589443	78.8832284
2.68914956	78.44363146
2.801564027	77.90634631
2.879765396	77.36906117
2.930596285	76.73408781
2.956989247	76.09911446
2.96285435	75.4641411
2.953079179	74.92685595
2.934506354	74.43841491
2.905180841	73.99881797
2.864125122	73.60806514
2.810361681	73.2173123
2.744868035	72.87540357
2.668621701	72.43580664
2.581622678	72.0450538
2.485826002	71.55661276
2.384164223	71.11701582
2.279569892	70.62857478
2.186705767	70.09128963
2.102639296	69.65169269
2.016617791	69.26093986
1.936461388	69.16325165
1.866080156	70.72626299
1.806451613	75.61067341
1.75659824	84.50030039
1.713587488	95.68560027
1.677419355	106.0405504
1.646138807	113.8556071
1.617790811	119.1796144
1.591397849	122.8429222
1.565982405	125.4316598
1.544477028	126.945827
1.524926686	127.434268
1.502443793	127.1900475
1.477028348	126.5550742
1.449657869	125.6270362
1.421309873	124.3570895
1.393939394	122.6963899
1.367546432	120.6937817
1.344086022	118.3004205
1.321603128	115.6628389
1.300097752	112.7810368
1.279569892	109.5573259
1.265884653	106.1382386
1.256109482	102.4749308
1.244379277	98.76277884
1.22971652	95.05062691
1.211143695	91.68038372
1.188660802	88.79858157
1.164222874	86.60059687
1.14173998	84.98874143
1.130009775	83.86532704
1.14173998	83.13266547
1.189638319	82.54653622
1.283479961	82.15578339
1.427174976	81.86271876
1.58455523	81.56965413
1.757575758	81.1789013
1.968719453	80.88583668
2.190615836	80.49508384
2.399804497	80.0554869
2.579667644	79.61588996
2.725317693	79.12744892
2.833822092	78.54131967
2.910068426	77.90634631
2.957966764	77.32021706
2.983382209	76.6363996
2.992179863	76.00142625
2.985337243	75.415297
2.965786901	74.92685595
2.935483871	74.48725902
2.894428152	74.19419439
2.841642229	73.80344156
2.778103617	73.41268872
2.700879765	73.07077999
2.612903226	72.68002716
2.515151515	72.28927432
2.411534702	71.80083328
2.30400782	71.21470403
2.196480938	70.72626299
2.093841642	70.18897784
2.008797654	69.7493809
1.936461388	69.99360142
1.866080156	72.19158611
1.803519062	77.85750221
1.748778104	87.23557023
1.701857283	98.17664959
1.662756598	107.8477822
1.6285435	114.9301774
1.600195503	119.7657437
1.575757576	123.1359869
1.551319648	125.2851275
1.52688172	126.4085419
1.506353861	126.6039183
1.487781036	126.1154772
1.463343109	125.2362834
1.436950147	124.0640249
1.402737048	122.5010135
1.3714565	120.5960934
1.348973607	118.3492647
1.325513196	115.8582153
1.303030303	113.1229455
1.282502444	109.9969228
1.262952102	106.6755237
1.246334311	103.1587482
1.230694037	99.4954404
1.219941349	95.73444437
1.211143695	92.07113655
1.197458456	88.79858157
1.177908113	86.16099994
1.15542522	84.15839166
1.134897361	82.74191264
1.124144673	81.71618645
1.136852395	81.03236899
1.186705767	80.49508384
1.282502444	80.0554869
1.427174976	79.66473407
1.61485826	79.22513713
1.80058651	78.78554019
1.983382209	78.34594325
2.186705767	77.85750221
2.382209189	77.32021706
2.551319648	76.78293192
2.686217009	76.24564677
2.785923754	75.65951752
2.854349951	75.07338827
2.89540567	74.48725902
2.91202346	73.90112976
2.910068426	73.51037693
2.89540567	73.1196241
2.870967742	72.77771537
2.836754643	72.48465074
2.789833822	72.19158611
2.731182796	71.94736559
2.659824047	71.65430097
2.575757576	71.41008045
2.479960899	71.06817172
2.375366569	70.62857478
2.264907136	70.09128963
2.152492669	69.60284859
2.042033236	69.16325165
1.936461388	68.72365471
1.840664712	68.38174598
1.766373412	68.6259665
1.706744868	70.82395119
1.650048876	76.48986729
1.600195503	86.06331173
1.558162268	97.24861161
1.521994135	107.0662766
1.490713587	114.0509835
1.461388074	118.6911734
1.434017595	121.7195078
1.407624633	123.6244279
1.380254154	124.3570895
1.352883675	124.1617131
1.330400782	123.4290515
1.309872923	122.3056371
1.284457478	121.0356904
1.257086999	119.4726791
1.228739003	117.6166031
1.201368524	115.4186184
1.176930596	112.9764132
1.153470186	110.1922992
1.131964809	107.1639648
1.113391984	103.8425657
1.098729228	100.3746343
1.086021505	96.66248236
1.0742913	92.99917453
1.066471163	89.53124313
1.058651026	86.74712919
1.042033236	84.69567681
1.020527859	83.23035368
0.999022483	82.3023157
0.985337243	81.61849824
0.994134897	81.03236899
1.040078201	80.69046026
1.133919844	80.34855153
1.279569892	80.10433101
1.470185728	79.90895459
1.692082111	79.66473407
1.896383187	79.42051355
2.082111437	79.12744892
2.271749756	78.78554019
2.440860215	78.34594325
2.576735093	77.85750221
2.676441838	77.22252885
2.742913001	76.68524371
2.781036168	76.09911446
2.797653959	75.61067341
2.796676442	75.21992058
2.782013685	74.87801185
2.754643206	74.53610312
2.714565005	74.24303849
2.668621701	73.85228566
2.613880743	73.51037693
2.544477028	73.1196241
2.463343109	72.63118305
2.3714565	72.09389791
2.270772239	71.55661276
2.166177908	71.06817172
2.061583578	70.62857478
1.960899316	70.18897784
1.867057674	69.84706911
1.783968719	70.23782194
1.712609971	72.68002716
1.65884653	78.8832284
1.616813294	88.70089336
1.578690127	99.69081682
1.544477028	108.9223525
1.515151515	115.4186184
1.490713587	119.7657437
1.469208211	122.5987017
1.449657869	124.2594013
1.430107527	124.8455305
1.410557185	124.6989982
1.391006843	124.0151807
1.3714565	122.9894546
1.351906158	121.7195078
1.336265885	120.1564965
1.322580645	118.2515764
1.304985337	116.0047476
1.286412512	113.5625424
1.267839687	110.8761167
1.251221896	107.9943145
1.235581623	104.7217596
1.217008798	101.3026723
1.201368524	97.59052034
1.190615836	93.97605662
1.177908113	90.60581343
1.16226784	87.82169948
1.147605083	85.67255889
1.133919844	84.15839166
1.11827957	83.13266547
1.11143695	82.3511598
1.12512219	81.81387466
1.174975562	81.37427772
1.271749756	80.93468078
1.417399804	80.54392795
1.605083089	80.25086332
1.822091887	79.90895459
2.047898338	79.61588996
2.264907136	79.32282534
2.456500489	78.8832284
2.597262952	78.49247557
2.697947214	78.00403452
2.779081134	77.41790527
2.836754643	76.78293192
2.870967742	76.19680266
2.887585533	75.56182931
2.88856305	74.92685595
2.875855327	74.43841491
2.8514174	73.99881797
2.815249267	73.60806514
2.766373412	73.2173123
2.705767351	72.87540357
2.641251222	72.48465074
2.57086999	72.0450538
2.485826002	71.60545686
2.390029326	71.16585992
2.288367546	70.67741888
2.184750733	70.23782194
2.084066471	69.79822501
1.991202346	69.30978396
1.906158358	68.96787523
1.831867058	69.65169269
1.769305963	73.07077999
1.716520039	80.44623974
1.671554252	91.09425447
1.637341153	102.2795543
1.610948192	111.3645577
1.58455523	117.6166031
1.559139785	121.8171961
1.534701857	124.6989982
1.51026393	126.4085419
1.485826002	127.1900475
1.460410557	127.1412034
1.434995112	126.5550742
1.409579668	125.6758803
1.383186706	124.5524659
1.357771261	123.0382987
1.338220919	121.2310668
1.322580645	119.0330821
1.303030303	116.639721
1.283479961	113.9044512
1.263929619	110.9249608
1.245356794	107.7012499
1.228739003	104.1844744
1.213098729	100.4234784
1.198435973	96.61363825
1.183773216	92.95033043
1.164222874	89.67777544
1.140762463	87.13788202
1.11827957	85.28180606
1.10459433	84.10954756
1.10459433	83.23035368
1.12512219	82.69306853
1.182795699	82.3023157
1.287390029	82.00925107
1.442815249	81.71618645
1.640273705	81.42312182
1.866080156	81.1300572
2.100684262	80.78814847
2.324535679	80.44623974
2.521016618	80.0066428
2.680351906	79.46935765
2.790811339	78.98091661
2.864125122	78.34594325
2.919843597	77.759814
2.956989247	77.12484065
2.975562072	76.48986729
2.979472141	75.85489394
2.970674487	75.31760879
2.94916911	74.78032364
2.914956012	74.3407267
2.868035191	73.99881797
2.806451613	73.60806514
2.732160313	73.31500051
2.646138807	72.97309178
2.561094819	72.63118305
2.474095797	72.19158611
2.373411535	71.75198918
2.26686217	71.21470403
2.159335288	70.72626299
2.056695992	70.23782194
1.96285435	69.94475732
1.879765396	70.62857478
1.808406647	73.80344156
1.747800587	80.88583668
1.696969697	91.09425447
1.655913978	101.9864897
1.625610948	110.9738049
1.601173021	117.3235385
1.576735093	121.5729755
1.553274682	124.5036218
1.528836755	126.2620095
1.504398827	126.9946711
1.479960899	126.945827
1.453567937	126.2620095
1.427174976	125.2851275
1.398826979	124.0640249
1.370478983	122.4521694
1.343108504	120.4984052
1.31769306	118.3004205
1.298142717	115.7605271
1.282502444	112.9764132
1.264907136	109.9480787
1.246334311	106.6755237
1.228739003	103.1587482
1.213098729	99.54428451
1.197458456	95.9786649
1.181818182	92.5595776
1.16226784	89.53124313
1.139784946	87.18672613
1.117302053	85.42833837
1.100684262	84.15839166
1.097751711	83.37688599
1.116324536	82.79075674
1.170087977	82.44884801
1.268817204	82.15578339
1.416422287	81.91156286
1.607038123	81.66734234
1.826979472	81.27658951
2.056695992	80.93468078
2.277614858	80.59277205
2.474095797	80.25086332
2.635386119	79.81126638
2.758553275	79.22513713
2.83773216	78.68785198
2.885630499	78.10172273
2.91886608	77.46674938
2.936461388	76.88062012
2.940371457	76.19680266
2.930596285	75.61067341
2.909090909	75.07338827
2.87487781	74.63379133
2.827956989	74.19419439
2.768328446	73.85228566
2.69599218	73.60806514
2.611925709	73.2173123
2.517106549	72.72887126
2.427174976	72.19158611
2.339198436	71.65430097
2.241446725	71.21470403
2.144672532	70.82395119
2.053763441	70.28666605
1.968719453	70.04244553
1.891495601	70.72626299
1.823069404	73.85228566
1.764418377	80.73930436
1.715542522	90.75234574
1.675464321	101.3026723
1.641251222	109.9480787
1.615835777	116.1024359
1.594330401	120.3518729
1.571847507	123.2825192
1.54740958	125.0409069
1.521016618	125.8224126
1.494623656	125.6758803
1.470185728	124.9432187
1.445747801	123.8198043
1.421309873	122.4521694
1.396871945	120.6937817
1.373411535	118.5934852
1.350928641	116.2978123
1.329423265	113.7579189
1.311827957	110.9738049
1.298142717	107.8477822
1.282502444	104.477539
1.267839687	100.8142312
1.253176931	97.00439108
1.237536657	93.24339506
1.219941349	89.82430776
1.198435973	86.99134971
1.173998045	84.84220912
1.149560117	83.37688599
1.130987292	82.3023157
1.129032258	81.56965413
1.146627566	81.1789013
1.193548387	80.93468078
1.283479961	80.78814847
1.420332356	80.54392795
1.597262952	80.34855153
1.801564027	80.10433101
2.017595308	79.81126638
2.226783969	79.46935765
2.414467253	79.02976071
2.569892473	78.44363146
2.68914956	77.759814
2.773216031	77.12484065
2.826979472	76.48986729
2.853372434	75.80604983
2.861192571	75.12223237
2.85826002	74.53610312
2.84457478	74.09650618
2.82111437	73.65690924
2.786901271	73.2173123
2.73998045	72.92424768
2.681329423	72.53349484
2.609970674	72.09389791
2.525904203	71.75198918
2.433040078	71.21470403
2.331378299	70.72626299
2.238514174	70.23782194
2.150537634	69.65169269
2.054740958	69.16325165
1.959921799	68.72365471
1.871945259	68.82134292
1.792766373	70.23782194
1.72629521	74.78032364
1.669599218	83.23035368
1.622678397	93.92721252
1.58455523	104.0379421
1.551319648	111.6576224
1.521994135	116.7374092
1.494623656	120.1076524
1.47311828	122.256793
1.454545455	123.184831
1.432062561	123.2336751
1.407624633	122.5987017
1.380254154	121.5729755
1.350928641	120.1076524
1.321603128	118.495797
1.293255132	116.5420328
1.26686217	114.4417363
1.242424242	112.0972193
1.220918866	109.5084818
1.202346041	106.6755237
1.190615836	103.6960334
1.182795699	100.4234784
1.173020528	97.00439108
1.16226784	93.48761558
1.149560117	90.3127488
1.134897361	87.72401127
1.116324536	85.86793531
1.093841642	84.69567681
1.071358749	83.86532704
1.056695992	83.23035368
1.060606061	82.79075674
1.095796676	82.49769212
1.174975562	82.15578339
1.277614858	81.91156286
1.468230694	81.66734234
1.677419355	81.42312182
1.840664712	81.03236899
2.034213099	80.59277205
2.226783969	80.10433101
2.395894428	79.56704586
2.531769306	78.8832284
2.632453568	78.19941094
2.700879765	77.46674938
2.740957967	76.78293192
2.759530792	76.19680266
2.761485826	75.56182931
2.750733138	75.07338827
2.731182796	74.63379133
2.701857283	74.24303849
2.662756598	73.85228566
2.611925709	73.55922103
2.549364614	73.2173123
2.475073314	72.87540357
2.390029326	72.43580664
2.298142717	71.94736559
2.203323558	71.50776865
2.109481916	71.06817172
2.019550342	70.67741888
1.945259042	70.23782194
1.883675464	70.09128963
1.824046921	71.06817172
1.771260997	74.78032364
1.72629521	82.3511598
1.688172043	92.85264222
1.655913978	103.500657
1.6285435	111.8041547
1.603128055	117.4700708
1.578690127	121.2799109
1.554252199	123.9174925
1.528836755	125.4316598
1.508308895	125.8712567
1.488758553	125.4316598
1.464320626	124.5524659
1.437927664	123.4290515
1.411534702	122.0614166
1.38514174	120.3518729
1.360703812	118.3492647
1.337243402	116.0535918
1.314760508	113.5136983
1.294232649	110.7295844
1.277614858	107.750094
1.263929619	104.4286949
1.252199413	100.9119194
1.245356794	97.29745571
1.240469208	93.7318361
1.230694037	90.50812522
1.216031281	87.91938769
1.196480938	85.96562352
1.175953079	84.69567681
1.159335288	83.71879472
1.157380254	83.03497726
1.183773216	82.49769212
1.249266862	82.15578339
1.362658847	81.81387466
1.523949169	81.47196593
1.691104594	81.1300572
1.864125122	80.78814847
2.066471163	80.44623974
2.269794721	80.0554869
2.453567937	79.61588996
2.620723363	79.02976071
2.744868035	78.44363146
2.816226784	77.85750221
2.864125122	77.22252885
2.892473118	76.6363996
2.904203324	76.00142625
2.902248289	75.415297
2.887585533	74.92685595
2.863147605	74.48725902
2.829912023	74.09650618
2.784946237	73.80344156
2.727272727	73.41268872
2.657869013	73.07077999
2.576735093	72.68002716
2.485826002	72.19158611
2.389051808	71.75198918
2.288367546	71.21470403
2.186705767	70.67741888
2.08797654	70.18897784
1.996089932	69.65169269
1.921798631	69.40747217
1.862170088	70.18897784
1.806451613	73.65690924
1.75659824	80.98352488
1.713587488	91.4850073
1.677419355	102.4260867
1.640273705	111.3157136
1.608993157	117.4700708
1.587487781	121.6218196
1.56402737	124.4059336
1.539589443	126.1154772
1.514173998	126.7992947
1.485826002	126.6039183
1.462365591	125.9201008
1.442815249	124.9432187
1.419354839	123.673272
1.393939394	122.1102607
1.369501466	120.1564965
1.345063539	117.9096677
1.321603128	115.3697743
1.299120235	112.6345045
1.278592375	109.60617
1.259042033	106.2847709
1.240469208	102.7191513
1.223851417	99.05584346
1.212121212	95.29484744
1.202346041	91.87576014
1.186705767	88.94511388
1.160312805	86.69828508
1.134897361	85.13527375
1.120234604	84.10954756
1.117302053	83.4257301
1.171065494	83.03497726
1.247311828	82.74191264
1.330400782	82.49769212
1.474095797	82.25347159
1.693059629	81.86271876
1.894428152	81.47196593
2.052785924	81.1300572
2.240469208	80.69046026
2.450635386	80.15317511
2.62170088	79.61588996
2.735092864	79.02976071
2.820136852	78.44363146
2.868035191	77.759814
2.896383187	77.12484065
2.909090909	76.48986729
2.909090909	75.85489394
2.887585533	75.31760879
2.859237537	74.87801185
2.834799609	74.43841491
2.797653959	74.09650618
2.724340176	73.75459745
2.649071359	73.41268872
2.587487781	73.07077999
2.507331378	72.63118305
2.41544477	72.19158611
2.316715543	71.65430097
2.216031281	71.11701582
2.116324536	70.62857478
2.004887586	70.09128963
1.911045943	69.79822501
1.857282502	70.53088657
1.810361681	73.85228566
1.76344086	80.93468078
1.714565005	90.94772216
1.674486804	101.4492046
1.648093842	109.9969228
1.615835777	116.1024359
1.580645161	120.2541847
1.550342131	123.0382987
1.527859238	124.8455305
1.507331378	125.5781921
1.47311828	125.4805039
1.441837732	124.7966864
1.417399804	123.8198043
1.388074291	122.5010135
1.360703812	120.8891581
1.33431085	118.9353939
1.307917889	116.639721
1.284457478	114.0509835
1.261974585	111.1691813
1.241446725	108.0431587
1.2228739	104.6729155
1.206256109	101.1072958
1.189638319	97.34629981
1.176930596	93.7318361
1.165200391	90.3615929
1.146627566	87.47979075
1.123167155	85.23296196
1.101661779	83.4745742
1.091886608	82.10693928
1.105571848	81.03236899
1.158357771	80.25086332
1.26001955	79.66473407
1.411534702	79.22513713
1.607038123	78.73669609
1.832844575	78.29709915
2.069403715	77.85750221
2.269794721	77.36906117
2.436950147	76.92946423
2.595307918	76.44102319
2.727272727	76.00142625
2.826979472	75.4641411
2.896383187	74.92685595
2.938416422	74.2918826
2.957966764	73.75459745
2.956989247	73.2173123
2.940371457	72.87540357
2.911045943	72.48465074
2.868035191	72.0450538
2.819159335	71.65430097
2.76344086	71.31239224
2.694037146	70.9216394
2.611925709	70.53088657
2.518084066	70.09128963
2.41544477	69.65169269
2.306940371	69.16325165
2.196480938	68.67481061
2.088954057	68.08868136
1.986314761	67.69792852
1.892473118	67.16064337
1.80742913	66.81873464
1.73313783	66.91642285
1.674486804	68.91903113
1.627565982	74.2918826
1.582600196	83.4745742
1.541544477	94.56218587
1.50342131	104.4286949
1.468230694	111.5599342
1.434995112	116.2489682
1.403714565	119.4238349
1.373411535	121.4264432
1.344086022	122.3544812
1.315738025	122.256793
1.286412512	121.5729755
1.263929619	120.4495611
1.244379277	119.1307703
1.220918866	117.6166031
1.196480938	115.7605271
1.172043011	113.6113865
1.147605083	111.3157136
1.12512219	108.7269761
1.103616813	105.845174
1.082111437	102.8168395
1.062561095	99.34890809
1.04398827	95.78328848
1.024437928	92.16882476
1.000977517	88.74973746
0.980449658	85.81909121
0.961876833	83.4745742
0.939393939	81.91156286
0.920821114	80.93468078
0.920821114	80.25086332
0.955034213	79.81126638
1.035190616	79.46935765
1.168132942	79.32282534
1.350928641	79.12744892
1.572825024	78.9320725
1.815249267	78.73669609
2.055718475	78.59016377
2.252199413	78.44363146
2.408602151	78.10172273
2.548387097	77.759814
2.65884653	77.32021706
2.736070381	76.78293192
2.783968719	76.29449087
2.80742913	75.80604983
2.811339198	75.36645289
2.799608993	74.92685595
2.775171065	74.48725902
2.73998045	74.09650618
2.692082111	73.75459745
2.631476051	73.36384462
2.567937439	72.97309178
2.498533724	72.53349484
2.414467253	72.0450538
2.319648094	71.55661276
2.217008798	70.97048351
2.112414467	70.43319836
2.008797654	69.84706911
1.910068426	69.30978396
1.818181818	68.82134292
1.737047898	68.6259665
1.668621701	69.79822501
1.610948192	73.90112976
1.567937439	82.00925107
1.536656891	92.6084217
1.508308895	102.8168395
1.484848485	110.4853639
1.463343109	115.7605271
1.443792766	119.3261467
1.426197458	121.6218196
1.409579668	122.7940781
1.393939394	122.9894546
1.376344086	122.4521694
1.357771261	121.4264432
1.337243402	120.1076524
1.315738025	118.5934852
1.298142717	116.7374092
1.282502444	114.5394245
1.264907136	112.0972193
1.246334311	109.5084818
1.227761486	106.6755237
1.211143695	103.6960334
1.195503421	100.4234784
1.180840665	97.05323519
1.167155425	93.63414789
1.150537634	90.21506059
1.129032258	87.23557023
1.103616813	84.74452091
1.084066471	82.93728905
1.070381232	81.71618645
1.065493646	80.98352488
1.086021505	80.54392795
1.144672532	80.15317511
1.253176931	79.86011049
1.413489736	79.56704586
1.616813294	79.17629303
1.846529814	78.78554019
2.084066471	78.49247557
2.307917889	78.19941094
2.501466276	77.80865811
2.655913978	77.41790527
2.760508309	76.97830833
2.826979472	76.53871139
2.872922776	76.09911446
2.897360704	75.56182931
2.904203324	74.92685595
2.897360704	74.24303849
2.876832845	73.60806514
2.84457478	73.1196241
2.80058651	72.53349484
2.744868035	72.0450538
2.676441838	71.55661276
2.596285435	71.11701582
2.515151515	70.8727953
[truncated: 309,001 more rows]
